# Supplementary material
Source: PubMed Central journal article supplement (PMC3724768)
Supplement: NIHMS451569-supplement-01.pdf [file NIHMS451569-supplement-01.pdf]

**Table E1. Contents of aCSF**

|                                | aCSF in baseline perfusion | aCSF during OGD |
|--------------------------------|----------------------------|-----------------|
| pH                             | 7.36 ± 0.0                 | 7.31 ± 0.0      |
| pCO <sub>2</sub> (mmHg)        | 46.2 ± 0.9                 | 48.3 ± 1.2      |
| pO <sub>2</sub> (mmHg)         | 648 ± 14                   | 54.8 ± 2.8      |
| HCO <sub>3</sub> (mmol/L)      | 26 ± 0.6                   | 23.6 ± 0.5      |
| Na (mmol/L)                    | 141 ± 0.8                  | 141 ± 0.6       |
| K (mmol/L)                     | 3.1 ± 0.0                  | 3.1 ± 0.0       |
| Ca (mmol/L)                    | 1.5 ± 0.0                  | 1.5 ± 0.0       |
| Cl (mmol/L)                    | 130 ± 0.8                  | 130 ± 0.4       |
| O <sub>2</sub> Content (mL/dL) | 1.94 ± 0.04                | 0.16 ± 0.01     |

aCSF, artificial cerebrospinal fluid; OGD, oxygen-glucose deprivation.
